# Supplementary material for: Carbon dioxide hydrogenation to methanol over polybenzoxazine-based mesocarbon supported Cu–Zn catalyst
Source: Royal Society of Chemistry journal article supplement (doi:10.1039/d1nj01475g), 2021-01-01
Supplement: d1nj01475g1.pdf [file d1nj01475g1.pdf]

## Supplementary Document

### **Carbon dioxide hydrogenation to methanol over polybenzoxazine-based mesocarbon supported Cu-Zn catalyst**

**Varisara Deerattrakul<sup>1</sup>, Anurak Chukchuan<sup>1</sup>, Nattanida Thepphankulngarm<sup>1</sup>, Jirayu  
Pornjaturawit<sup>1</sup>, Napas Vacharameteevoranun<sup>1</sup>, Thanyalak Chaisuwan<sup>2,3</sup>, Paisan  
Kongkachuichay<sup>1\*</sup>**

*<sup>1</sup> Department of Chemical Engineering, Faculty of Engineering, and Research Network of  
NANOTEC-KU on NanoCatalysts and NanoMaterials Sustainable Energy and Environment,  
Kasetsart University, Bangkok 10900, Thailand*

*<sup>2</sup>The Petroleum and Petrochemical College, Chulalongkorn University, Bangkok 10330,  
Thailand*

*<sup>3</sup>Center of Excellence on Petrochemical and Materials Technology, Bangkok 10330, Thailand*

*\*Corresponding author ([paisan.k@ku.ac.th](mailto:paisan.k@ku.ac.th))*

Published in New Journal of Chemistry

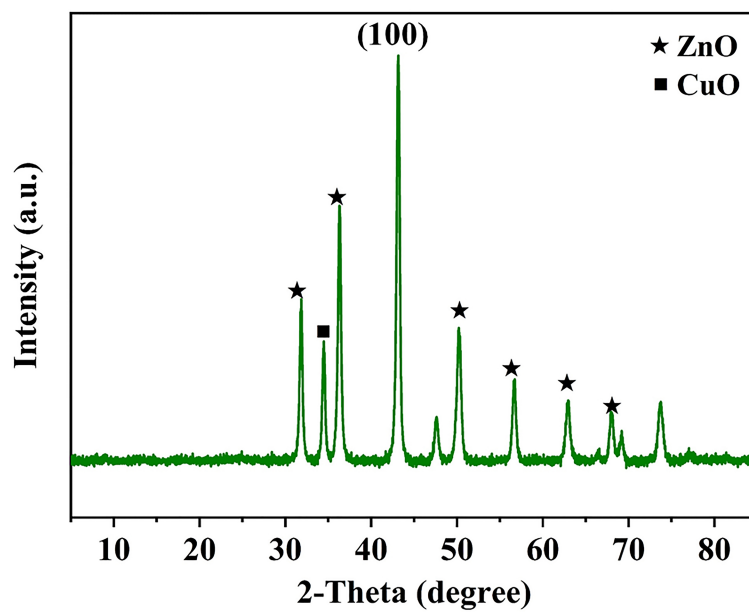

**Fig. S1.** XRD patterns of spent catalyst with the long time-on-stream of 10 h.
